# Supplementary material for: Size-controllable luminescent single crystal CaF2 nanocubesElectronic supplementary information (ESI) available: two TEM images and two PL spectra. See http://www.rsc.org/suppdata/cc/b3/b303614f/
Source: Royal Society of Chemistry journal article supplement (doi:10.1039/b303614f), 2003-01-01
Supplement: b303614f.doc [file b303614f.doc]

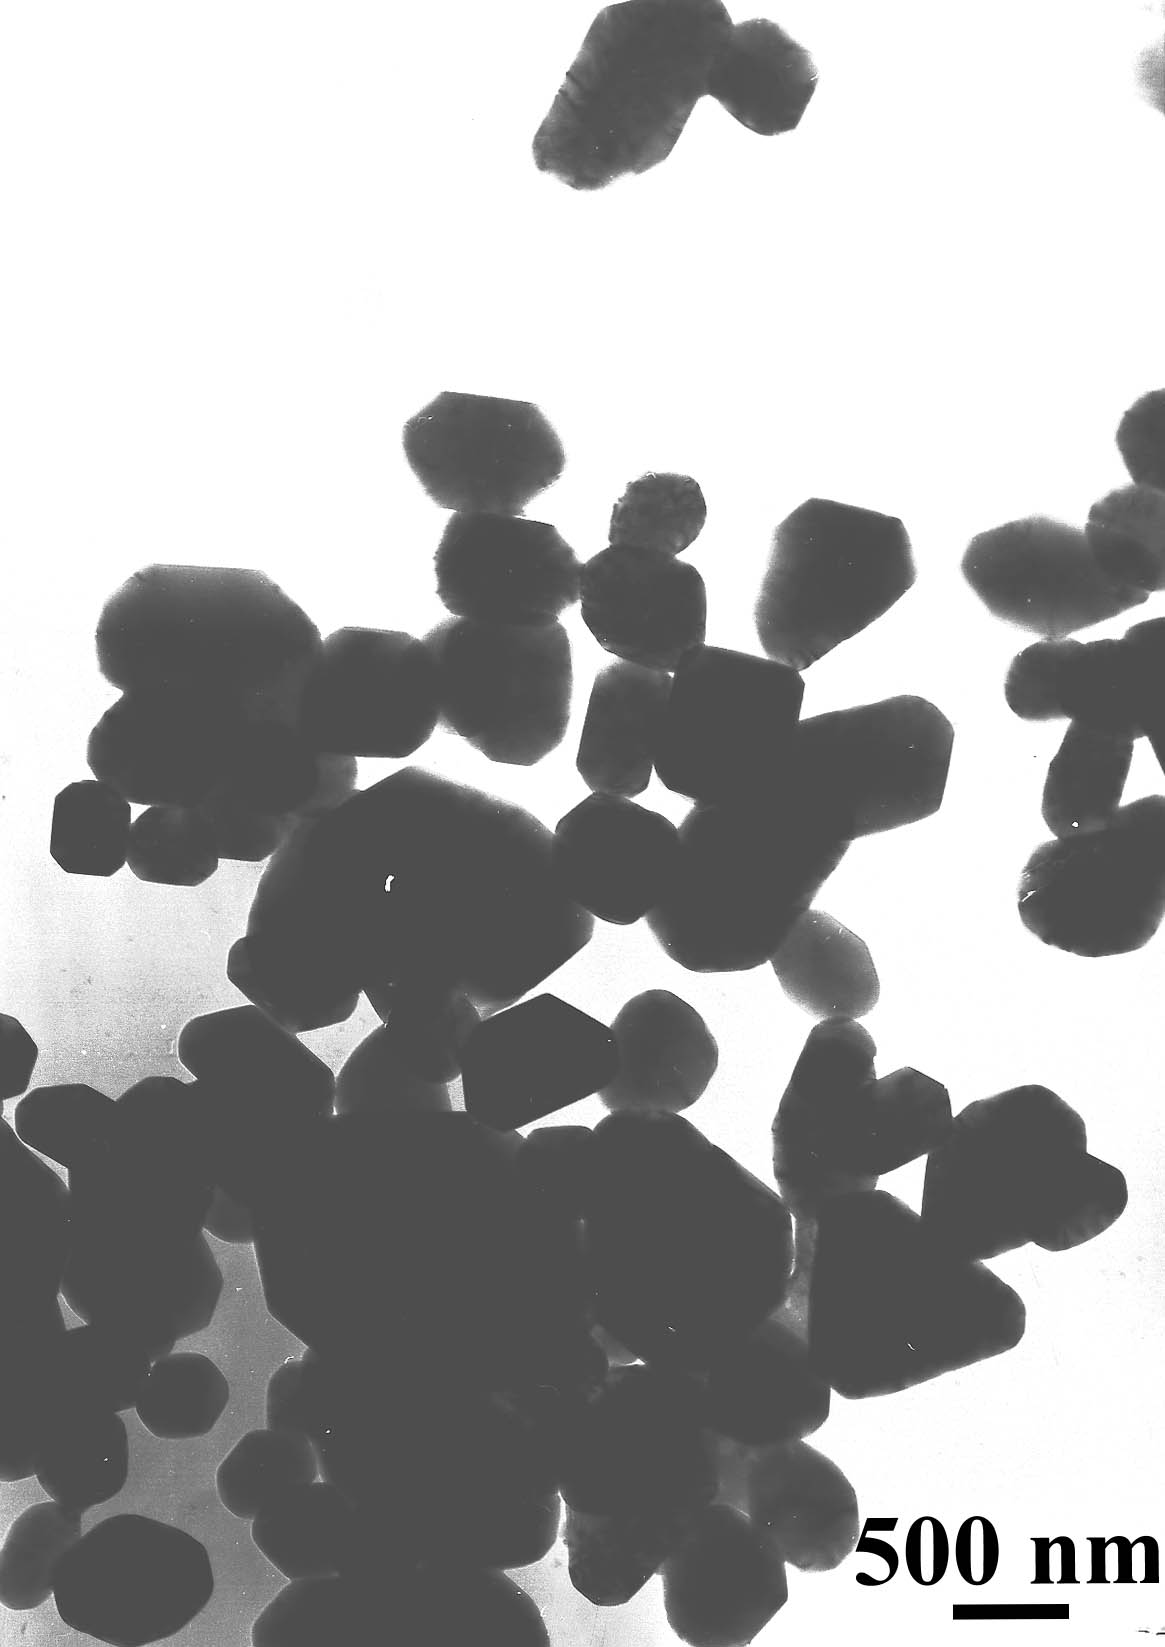


Figure S1: products obtained at the same condition as figure 3(a) except that concentration increased to 0.04M.


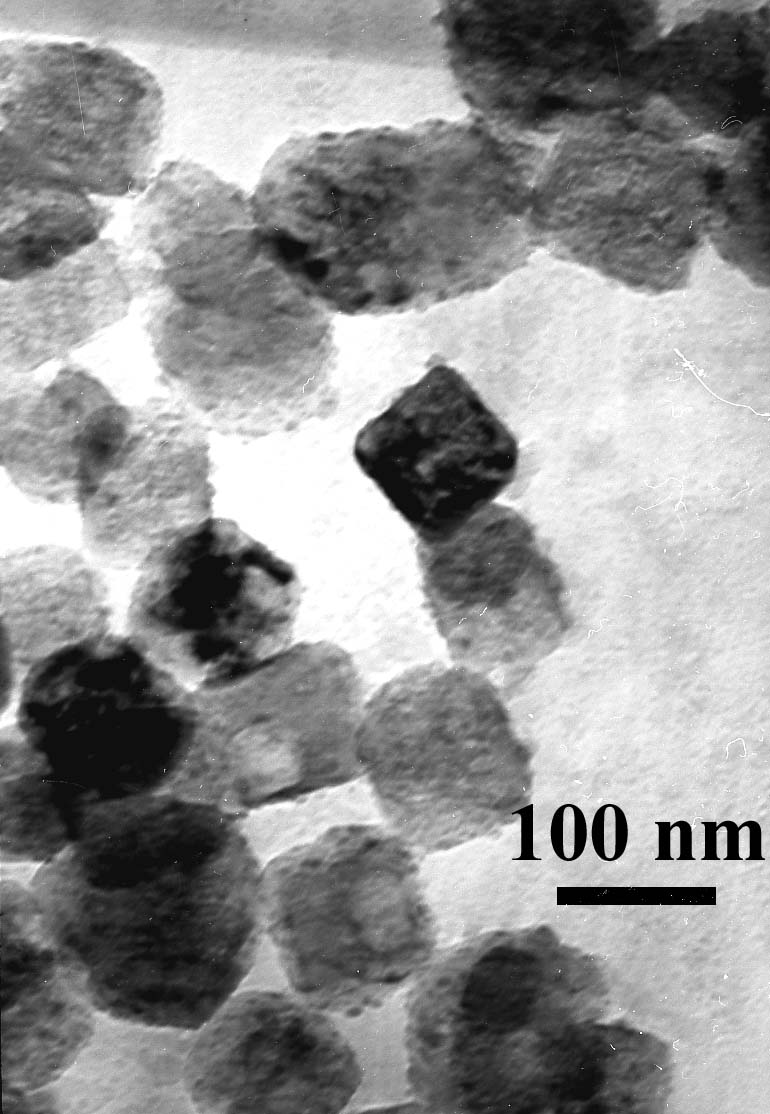


Figure S2 products obtained at the same condition as figure 4(a) except that pH value increased to 9.

a b


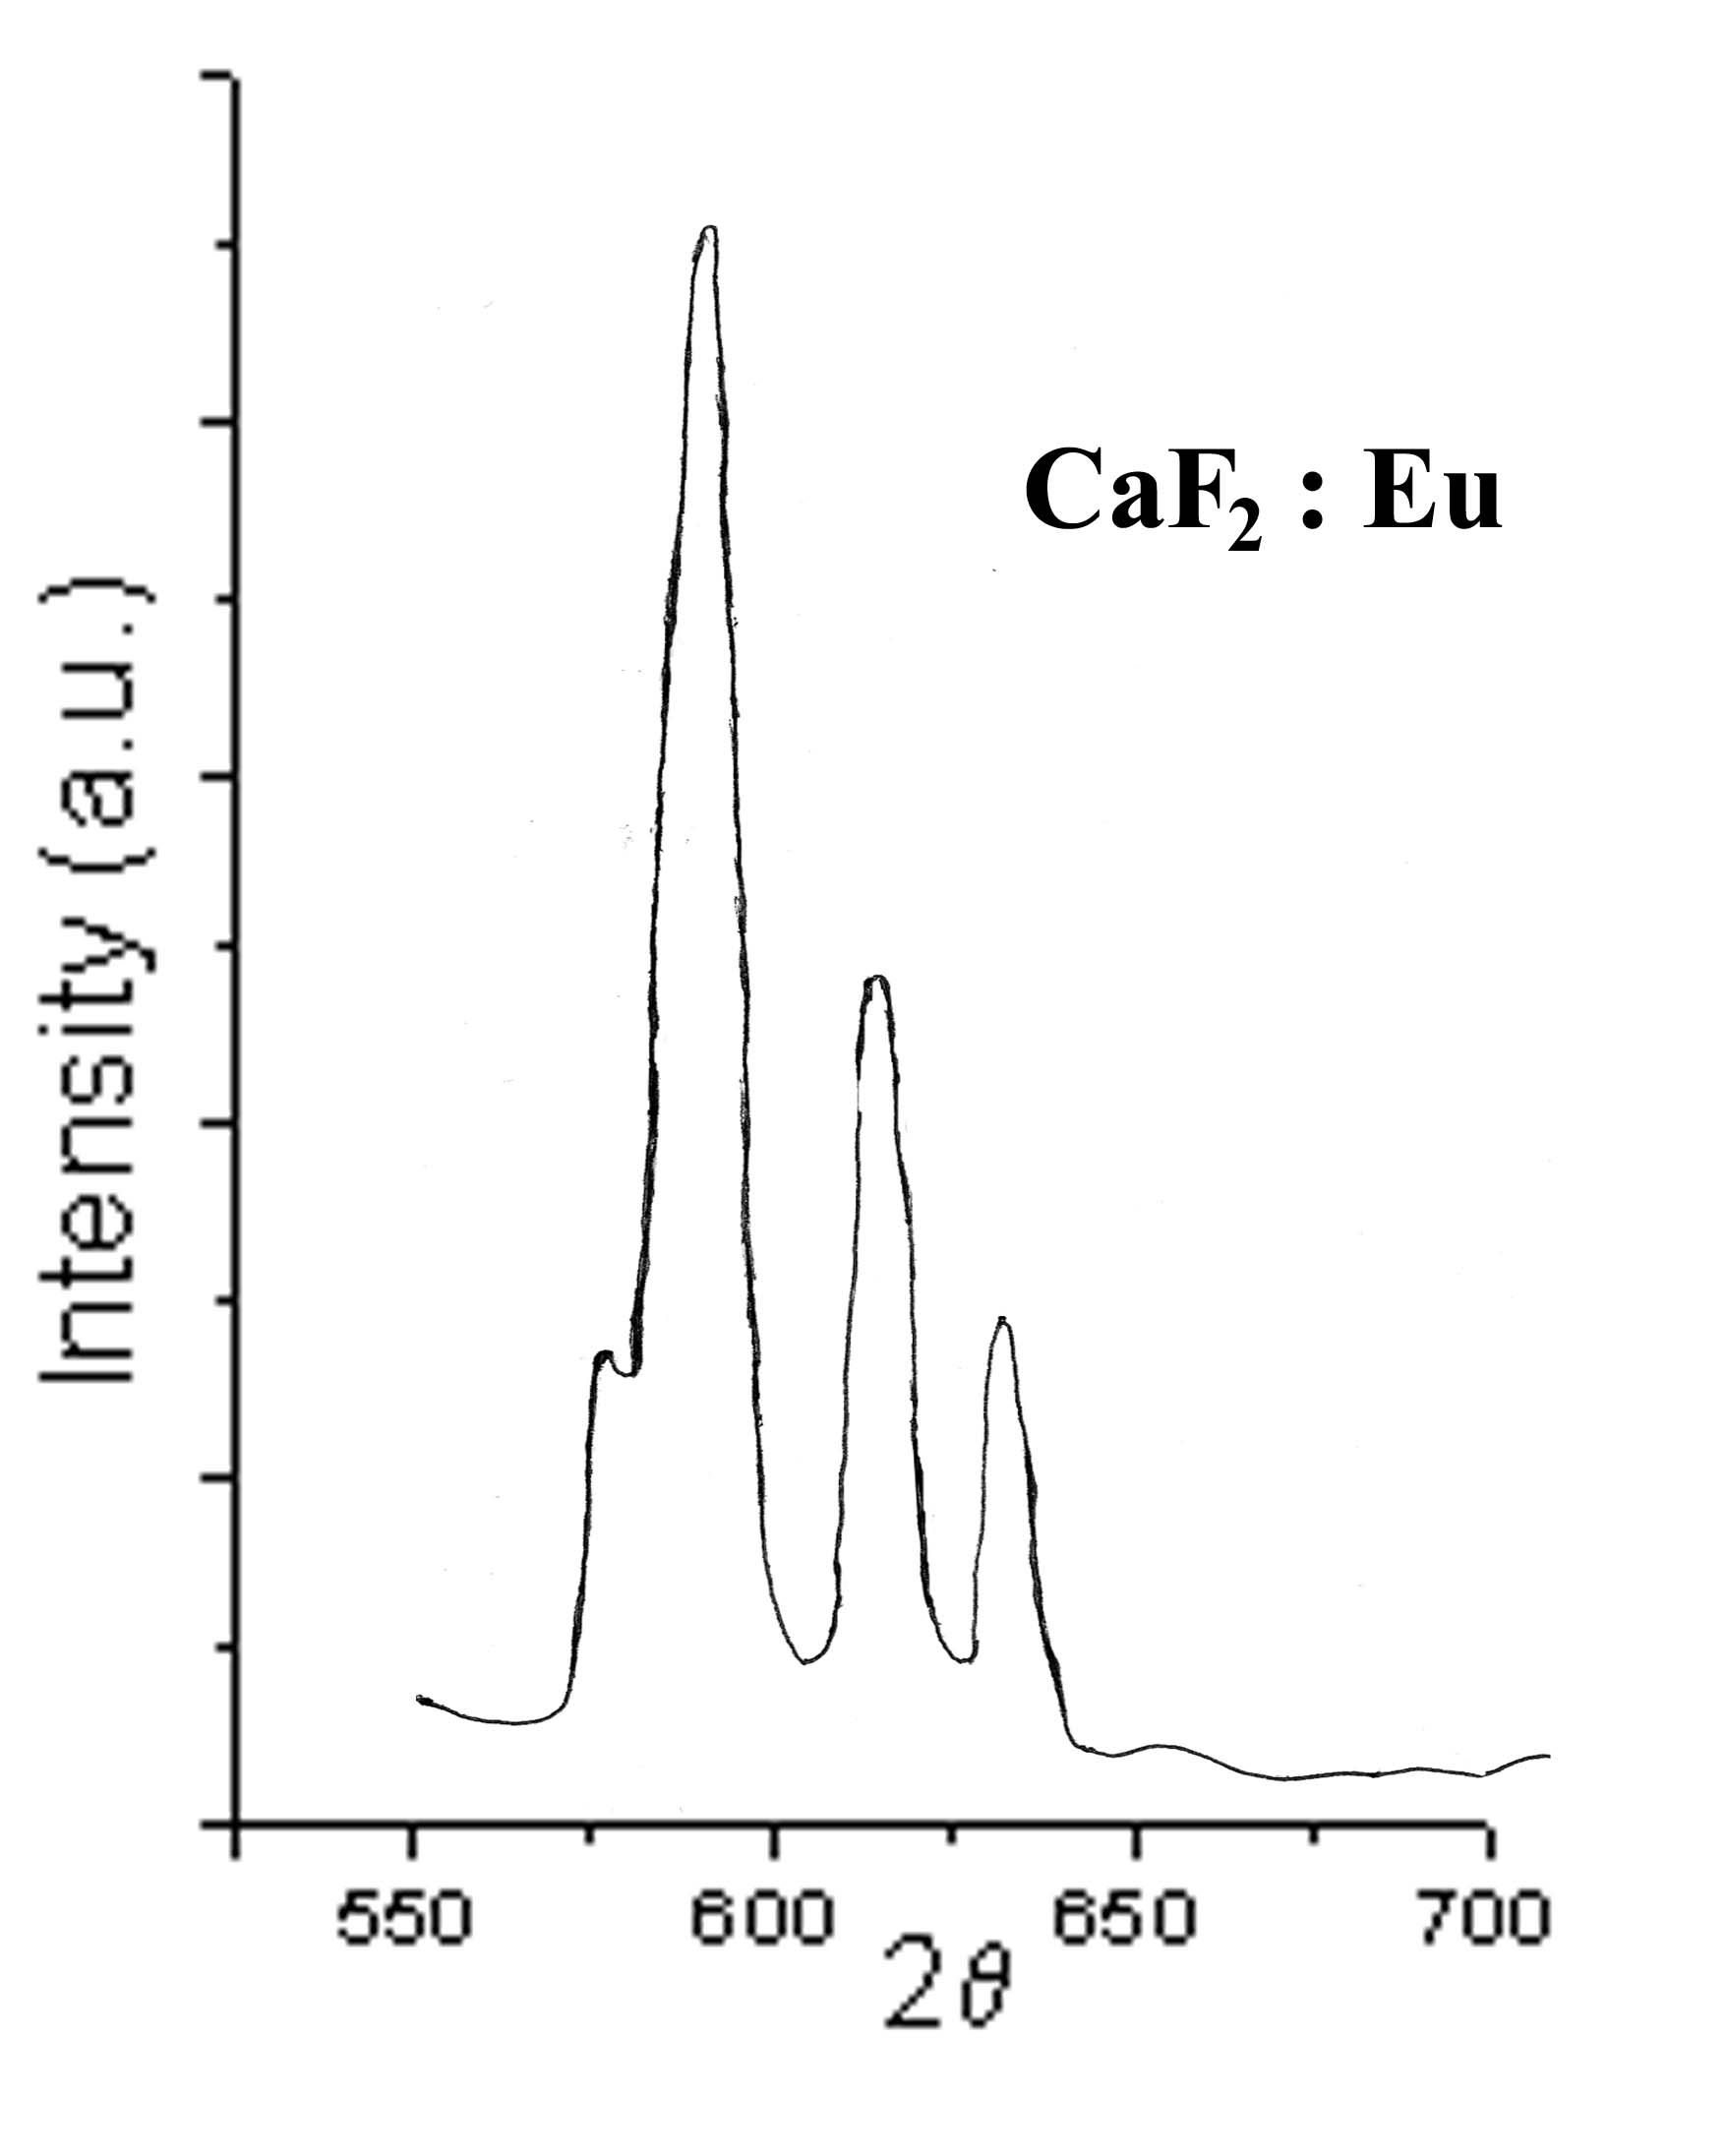

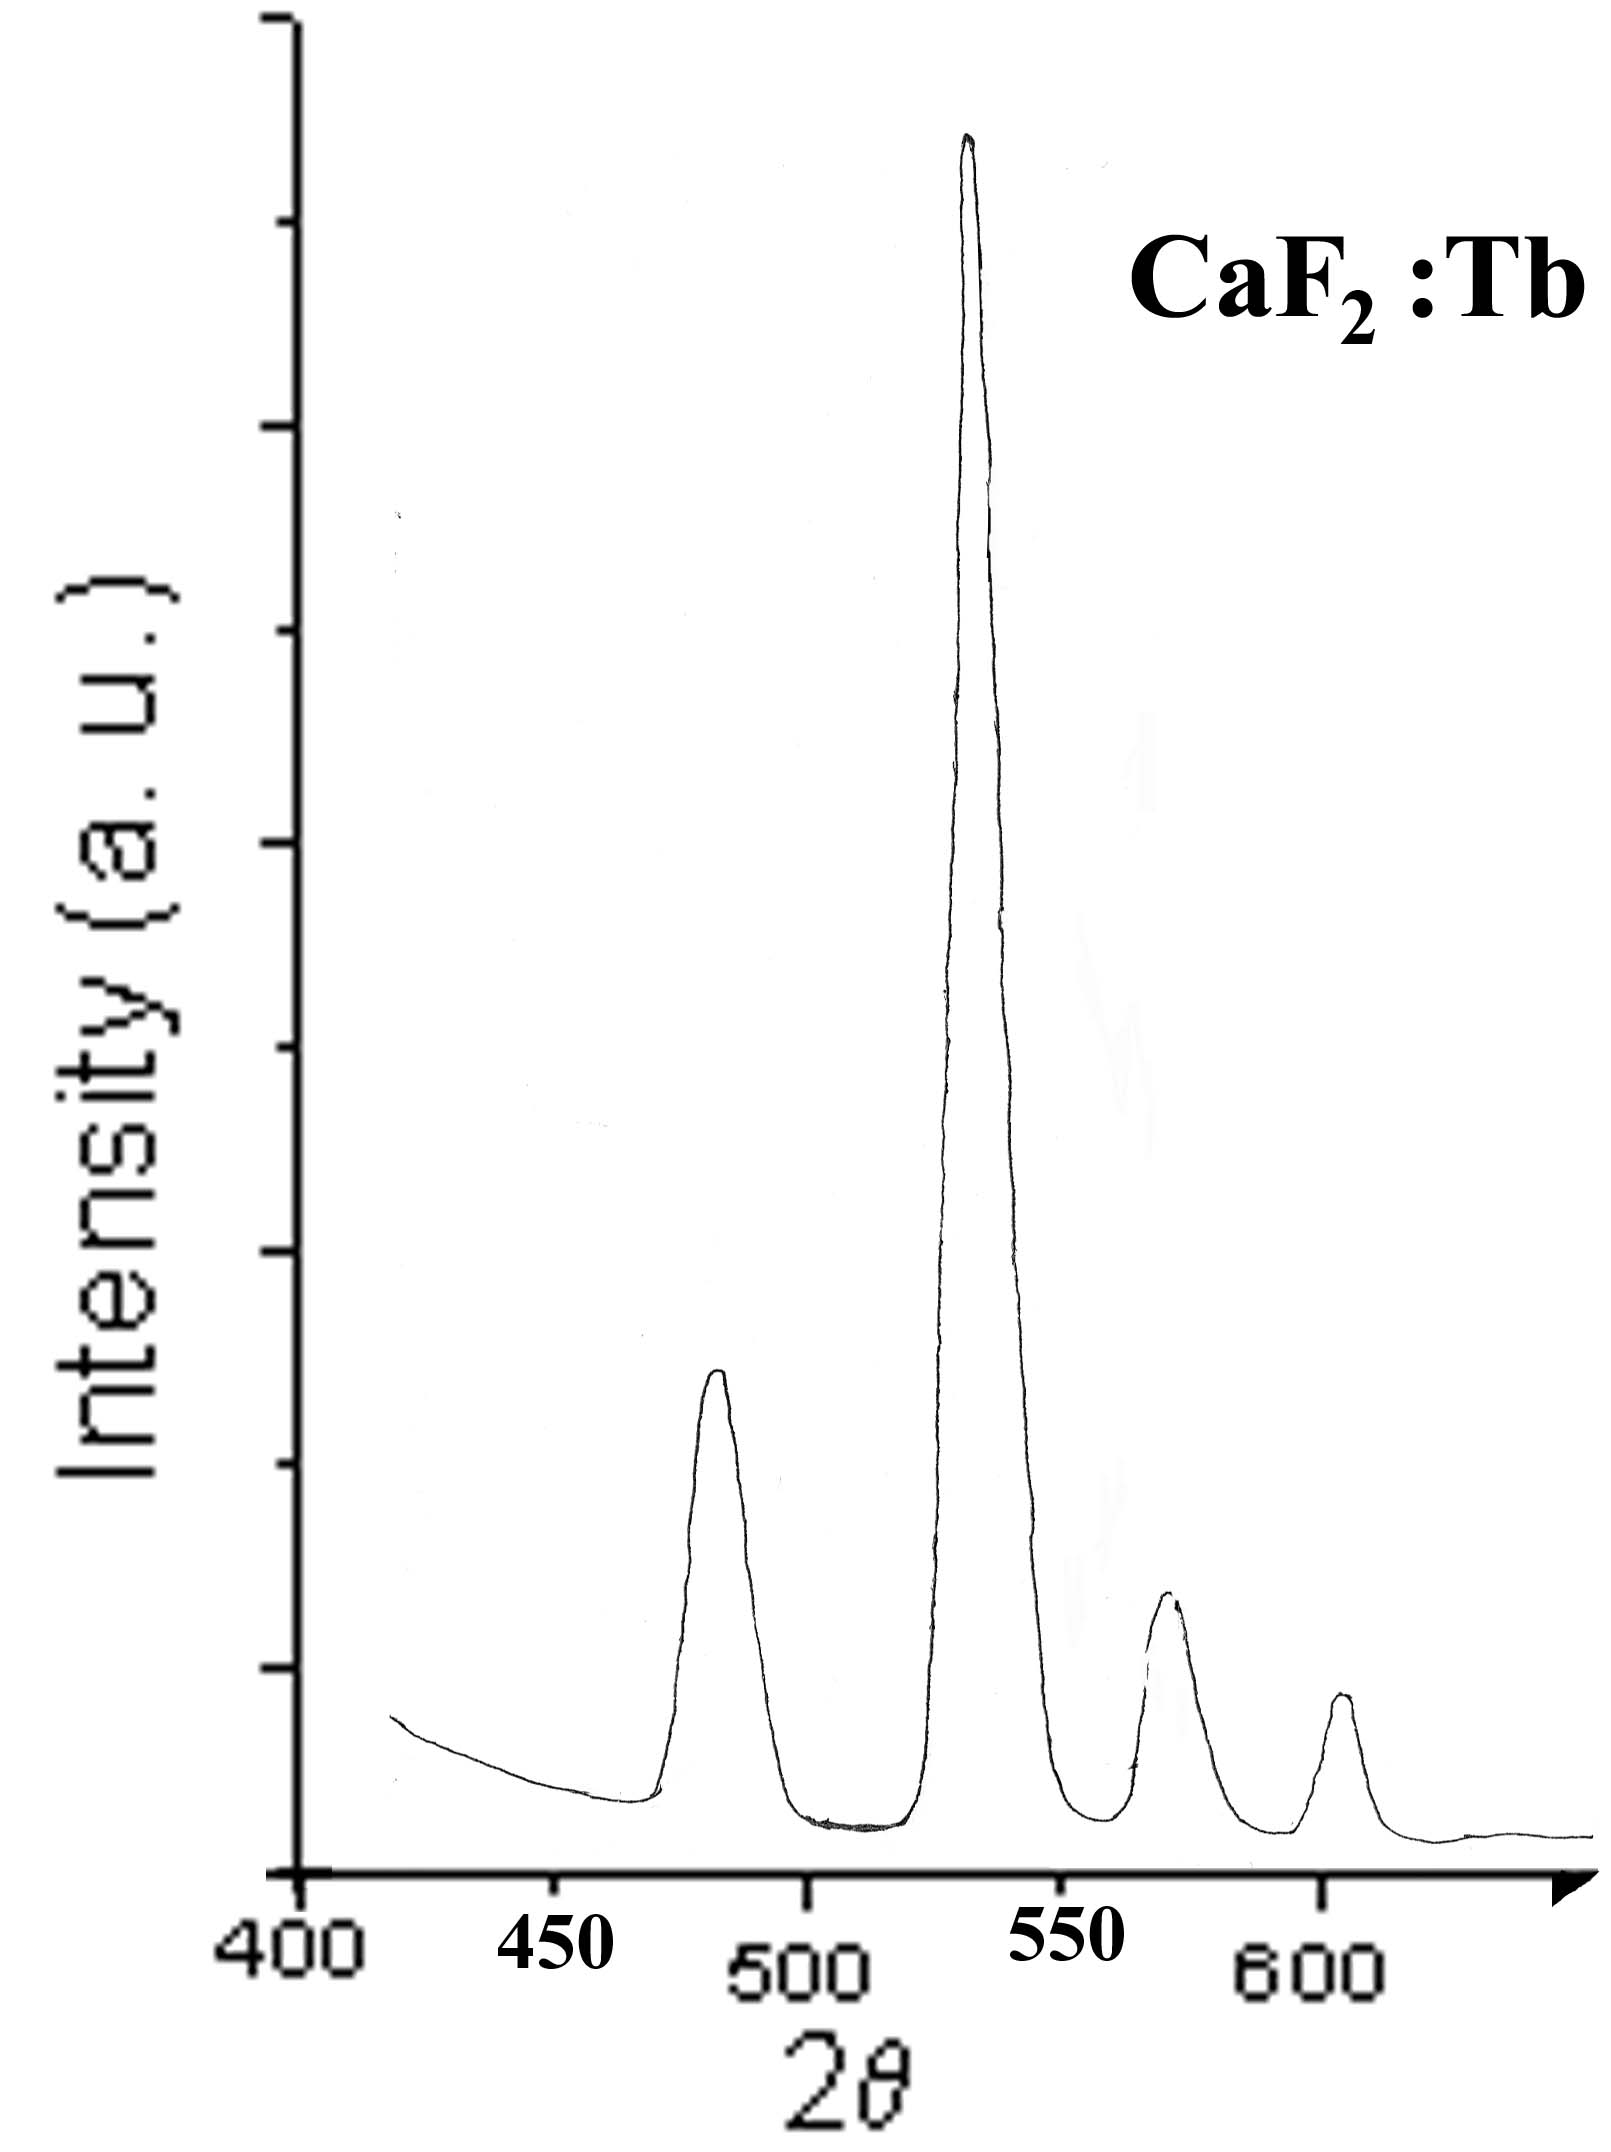


Figure S3 Photoluminescence spectra of CaF2 nanocubes doped with: a) Eu (III) and b)Tb(III).
